# Supplementary material for: A Stochastic Spatiotemporal Model of Rat Ventricular Myocyte Calcium Dynamics Demonstrated Necessary Features for Calcium Wave Propagation
Source: MDPI journal article supplement (doi:10.3390/membranes11120989), 2021-12-18
Supplement: s1 [file s1]

Experimental (S1 – Experimental Calcium Waves) and simulated (S2 – Simulated Calcium Waves) calcium waves under calcium overload conditions.
